# Supplementary material
Source: PubMed Central journal article supplement (PMC4068465)
Supplement: AAC.02469-14_zac006142938so1.pdf [file AAC.02469-14_zac006142938so1.pdf]

**Table S1:** qPCR data of *Lactobacillus*, *Gardnerella vaginalis*, *Atopobium*, *Prevotella*, *Veillonella*, *Mycoplasma hominis* and *Mobiluncus*.

| Patient                 | Visit | ng of target DNA/ $\mu$ g vaginal genomic DNA (mean $\pm$ SD) |                           |                                          |                                             |                                             |                                             |                              |
|-------------------------|-------|---------------------------------------------------------------|---------------------------|------------------------------------------|---------------------------------------------|---------------------------------------------|---------------------------------------------|------------------------------|
|                         |       | <i>Lactobacillus</i>                                          | <i>G. vaginalis</i>       | <i>Atopobium</i>                         | <i>Prevotella</i>                           | <i>Veillonella</i>                          | <i>M. hominis</i>                           | <i>Mobiluncus</i>            |
| <b>A (Remission)</b>    |       |                                                               |                           |                                          |                                             |                                             |                                             |                              |
|                         | V1    | $3.2 \times 10^1 \pm 6.1$                                     | $0.0 \pm 0.0$             | $3.2 \pm 7.3 \times 10^{-3}$             | $1.6 \times 10^{-1} \pm 5.9 \times 10^{-2}$ | $0.0 \pm 0.0$                               | $3.3 \times 10^{-2} \pm 7.7 \times 10^{-3}$ | $0.0 \pm 0.0$                |
| 20307                   | V3    | $3.3 \pm 6.4 \times 10^{-1}$                                  | $0.0 \pm 0.0$             | $0.0 \pm 0.0$                            | $0.0 \pm 0.0$                               | $0.0 \pm 0.0$                               | $2.5 \times 10^{-2} \pm 7.8 \times 10^{-3}$ | $0.0 \pm 0.0$                |
|                         | V4    | $1.7 \times 10^1 \pm 5.1 \times 10^{-1}$                      | $0.0 \pm 0.0$             | $0.0 \pm 0.0$                            | $0.0 \pm 0.0$                               | $0.0 \pm 0.0$                               | $2.6 \times 10^{-2} \pm 4.0 \times 10^{-3}$ | $0.0 \pm 0.0$                |
|                         | V1    | $6.1 \pm 6.2 \times 10^{-1}$                                  | $7.9 \times 10^1 \pm 4.2$ | $1.7 \times 10^2 \pm 2.2 \times 10^1$    | $1.3 \pm 1.7 \times 10^{-1}$                | $0.0 \pm 0.0$                               | $4.8 \pm 1.1$                               | $2.3 \pm 1.7 \times 10^{-2}$ |
| 20406                   | V3    | $3.5 \times 10^1 \pm 1.6$                                     | $0.0 \pm 0.0$             | $1.0 \times 10^1 \pm 3.2 \times 10^{-1}$ | $3.7 \times 10^{-2} \pm 9.4 \times 10^{-3}$ | $0.0 \pm 0.0$                               | $0.0 \pm 0.0$                               | $0.0 \pm 0.0$                |
|                         | V4    | $3.0 \times 10^1 \pm 9.6 \times 10^{-1}$                      | $0.0 \pm 0.0$             | $1.0 \times 10^1 \pm 2.2$                | $4.1 \times 10^{-2} \pm 8.9 \times 10^{-3}$ | $0.0 \pm 0.0$                               | $0.0 \pm 0.0$                               | $0.0 \pm 0.0$                |
|                         | V1    | $9.0 \times 10^1 \pm 2.1$                                     | $3.4 \times 10^1 \pm 4.8$ | $1.3 \times 10^2 \pm 5.0 \times 10^{-1}$ | $1.6 \times 10^1 \pm 4.5 \times 10^{-1}$    | $4.3 \times 10^{-1} \pm 2.0 \times 10^{-1}$ | $3.7 \times 10^{-1} \pm 9.2 \times 10^{-2}$ | $0.0 \pm 0.0$                |
| 20507                   | V3    | $3.4 \times 10^1 \pm 2.6$                                     | $0.0 \pm 0.0$             | $4.7 \pm 8.3 \times 10^{-1}$             | $3.2 \times 10^{-2} \pm 6.6 \times 10^{-3}$ | $0.0 \pm 0.0$                               | $2.6 \times 10^{-3} \pm 2.1 \times 10^{-3}$ | $0.0 \pm 0.0$                |
|                         | V4    | $4.4 \pm 6.0 \times 10^{-1}$                                  | $1.5 \times 10^1 \pm 1.5$ | $5.4 \times 10^1 \pm 7.3$                | $4.3 \pm 2.3 \times 10^{-1}$                | $0.0 \pm 0.0$                               | $1.7 \times 10^{-2} \pm 4.4 \times 10^{-3}$ | $0.0 \pm 0.0$                |
| <b>A (No remission)</b> |       |                                                               |                           |                                          |                                             |                                             |                                             |                              |
| 20313                   | V1    | $1.7 \pm 2.0 \times 10^{-1}$                                  | $6.1 \times 10^1 \pm 1.4$ | $1.2 \times 10^2 \pm 1.4 \times 10^1$    | $6.4 \pm 3.8 \times 10^{-1}$                | $0.0 \pm 0.0$                               | $3.7 \times 10^{-3} \pm 2.2 \times 10^{-3}$ | $5.2 \pm 1.5$                |

|       |    |                                             |                                          |                                          |                                             |                                             |                                             |                                       |
|-------|----|---------------------------------------------|------------------------------------------|------------------------------------------|---------------------------------------------|---------------------------------------------|---------------------------------------------|---------------------------------------|
|       | V3 | $1.1 \pm 2.2 \times 10^{-1}$                | $1.3 \times 10^1 \pm 4.7 \times 10^{-1}$ | $1.1 \times 10^2 \pm 4.8$                | $1.2 \times 10^1 \pm 2.7$                   | $0.0 \pm 0.0$                               | $0.0 \pm 0.0$                               | $0.0 \pm 0.0$                         |
| 20403 | V1 | $1.5 \times 10^1 \pm 1.6$                   | $1.6 \times 10^2 \pm 9.8 \times 10^1$    | $1.8 \times 10^1 \pm 1.5$                | $1.7 \times 10^1 \pm 8.4$                   | $0.0 \pm 0.0$                               | $1.8 \times 10^{-3} \pm 3.1 \times 10^{-5}$ | $0.0 \pm 0.0$                         |
|       | V3 | $5.0 \pm 1.0$                               | $2.4 \times 10^2 \pm 1.2 \times 10^1$    | $6.6 \pm 3.1 \times 10^{-1}$             | $1.1 \times 10^2 \pm 1.6 \times 10^1$       | $0.0 \pm 0.0$                               | $4.9 \times 10^{-3} \pm 2.6 \times 10^{-4}$ | $0.0 \pm 0.0$                         |
| 20412 | V1 | $5.2 \times 10^{-1} \pm 5.4 \times 10^{-3}$ | $9.4 \times 10^1 \pm 4.3$                | $6.6 \times 10^2 \pm 5.0 \times 10^1$    | $2.2 \times 10^2 \pm 3.5 \times 10^{-1}$    | $2.4 \times 10^{-1} \pm 2.7 \times 10^{-3}$ | $1.4 \times 10^1 \pm 1.4$                   | $0.0 \pm 0.0$                         |
|       | V3 | $2.3 \times 10^{-1} \pm 2.1 \times 10^{-2}$ | $0.0 \pm 0.0$                            | $4.6 \times 10^2 \pm 8.5 \times 10^1$    | $2.3 \times 10^1 \pm 3.5$                   | $0.0 \pm 0.0$                               | $1.1 \times 10^1 \pm 3.6$                   | $3.8 \pm 9.8 \times 10^{-1}$          |
| 20509 | V1 | $5.0 \pm 2.0 \times 10^{-1}$                | $1.2 \times 10^1 \pm 4.6$                | $2.5 \times 10^2 \pm 4.6$                | $9.4 \pm 8.7 \times 10^{-1}$                | $0.0 \pm 0.0$                               | $6.6 \times 10^{-4} \pm 2.1 \times 10^{-4}$ | $1.1 \times 10^1 \pm 5.1$             |
|       | V3 | $1.3 \times 10^2 \pm 1.0 \times 10^1$       | $1.4 \times 10^1 \pm 4.1$                | $6.1 \times 10^1 \pm 7.8 \times 10^{-1}$ | $1.0 \times 10^{-1} \pm 1.5 \times 10^{-3}$ | $0.0 \pm 0.0$                               | $6.3 \times 10^{-3} \pm 2.9 \times 10^{-3}$ | $0.0 \pm 0.0$                         |
| 20510 | V1 | $1.8 \times 10^{-1} \pm 3.4 \times 10^{-2}$ | $1.6 \times 10^1 \pm 6.9$                | $2.8 \times 10^2 \pm 2.4 \times 10^1$    | $6.7 \times 10^1 \pm 4.8$                   | $0.0 \pm 0.0$                               | $4.0 \times 10^{-3} \pm 2.4 \times 10^{-3}$ | $1.9 \times 10^1 \pm 1.2 \times 10^1$ |
|       | V3 | $0.0 \pm 0.0$                               | $8.9 \pm 7.4 \times 10^{-1}$             | $2.5 \times 10^2 \pm 6.2$                | $2.3 \times 10^1 \pm 3.2$                   | $0.0 \pm 0.0$                               | $1.9 \times 10^{-3} \pm 1.0 \times 10^{-3}$ | $0.0 \pm 0.0$                         |

### B (Remission)

|       |    |                                             |                                       |                                       |                                             |               |                                             |                           |
|-------|----|---------------------------------------------|---------------------------------------|---------------------------------------|---------------------------------------------|---------------|---------------------------------------------|---------------------------|
|       | V1 | $3.9 \pm 1.0 \times 10^{-1}$                | $5.4 \times 10^1 \pm 1.5$             | $3.0 \times 10^2 \pm 3.9 \times 10^1$ | $2.8 \times 10^2 \pm 3.8 \times 10^1$       | $5.6 \pm 1.7$ | $2.6 \times 10^{-1} \pm 7.2 \times 10^{-2}$ | $1.7 \times 10^1 \pm 1.1$ |
| 20302 | V3 | $5.3 \times 10^{-1} \pm 3.7 \times 10^{-1}$ | $0.0 \pm 0.0$                         | $3.2 \times 10^2 \pm 2.0 \times 10^2$ | $3.6 \pm 8.1 \times 10^{-1}$                | $0.0 \pm 0.0$ | $6.9 \times 10^{-2} \pm 6.6 \times 10^{-3}$ | $1.7 \times 10^1 \pm 6.0$ |
|       | V4 | $2.8 \times 10^1 \pm 1.4 \times 10^1$       | $0.0 \pm 0.0$                         | $0.0 \pm 0.0$                         | $6.1 \times 10^{-2} \pm 9.4 \times 10^{-3}$ | $0.0 \pm 0.0$ | $0.0 \pm 0.0$                               | $0.0 \pm 0.0$             |
|       | V1 | $1.6 \pm 1.7 \times 10^{-1}$                | $2.0 \times 10^2 \pm 3.9 \times 10^1$ | $2.5 \times 10^2 \pm 2.4 \times 10^1$ | $6.7 \pm 4.5 \times 10^{-1}$                | $0.0 \pm 0.0$ | $1.6 \pm 5.5 \times 10^{-1}$                | $0.0 \pm 0.0$             |
| 20521 | V3 | $7.9 \times 10^1 \pm 6.4 \times 10^{-1}$    | $0.0 \pm 0.0$                         | $4.5 \pm 1.4$                         | $0.0 \pm 0.0$                               | $0.0 \pm 0.0$ | $1.7 \times 10^{-3} \pm 1.2 \times 10^{-3}$ | $0.0 \pm 0.0$             |
|       | V4 | $2.5 \pm 4.1 \times 10^{-1}$                | $5.5 \times 10^1 \pm 1.1 \times 10^1$ | $1.6 \times 10^2 \pm 5.3$             | $6.4 \pm 7.7 \times 10^{-1}$                | $0.0 \pm 0.0$ | $1.1 \times 10^1 \pm 6.7$                   | $0.0 \pm 0.0$             |

|                         |    |                                             |                                             |                                       |                                             |                                             |                                             |                                          |
|-------------------------|----|---------------------------------------------|---------------------------------------------|---------------------------------------|---------------------------------------------|---------------------------------------------|---------------------------------------------|------------------------------------------|
|                         | V1 | $1.0 \pm 6.1 \times 10^{-1}$                | $2.0 \times 10^2 \pm 3.3$                   | $1.4 \times 10^2 \pm 1.1 \times 10^1$ | $2.1 \times 10^1 \pm 3.6$                   | $0.0 \pm 0.0$                               | $4.7 \times 10^{-3} \pm 3.3 \times 10^{-3}$ | $0.0 \pm 0.0$                            |
| 20524                   | V3 | $5.0 \times 10^1 \pm 1.2 \times 10^1$       | $0.0 \pm 0.0$                               | $4.1 \pm 6.7 \times 10^{-1}$          | $5.5 \pm 6.5 \times 10^{-1}$                | $0.0 \pm 0.0$                               | $1.2 \times 10^{-3} \pm 8.5 \times 10^{-5}$ | $0.0 \pm 0.0$                            |
|                         | V4 | $1.7 \times 10^{-1} \pm 7.7 \times 10^{-2}$ | $1.2 \times 10^2 \pm 1.6 \times 10^1$       | $1.0 \times 10^2 \pm 1.4 \times 10^1$ | $5.8 \pm 3.0 \times 10^{-1}$                | $0.0 \pm 0.0$                               | $6.9 \times 10^{-4} \pm 1.6 \times 10^{-4}$ | $0.0 \pm 0.0$                            |
| <b>B (No remission)</b> |    |                                             |                                             |                                       |                                             |                                             |                                             |                                          |
| 20303                   | V1 | $1.9 \pm 9.6 \times 10^{-1}$                | $6.0 \pm 1.6$                               | $2.1 \times 10^2 \pm 4.8 \times 10^1$ | $1.7 \times 10^2 \pm 4.0$                   | $3.4 \times 10^{-1} \pm 1.5 \times 10^{-1}$ | $1.0 \times 10^{-1} \pm 1.1 \times 10^{-2}$ | $2.6 \times 10^1 \pm 3.3 \times 10^{-1}$ |
|                         | V3 | $7.0 \pm 3.0 \times 10^{-1}$                | $3.3 \times 10^3 \pm 2.0 \times 10^2$       | $6.0 \times 10^2 \pm 9.6 \times 10^1$ | $1.8 \times 10^1 \pm 4.3$                   | $0.0 \pm 0.0$                               | $1.2 \pm 2.9 \times 10^{-1}$                | $1.2 \times 10^1 \pm 3.0$                |
| 20306                   | V1 | $2.7 \times 10^1 \pm 3.1$                   | $3.4 \times 10^{-1} \pm 7.3 \times 10^{-2}$ | $1.1 \times 10^1 \pm 3.0$             | $1.5 \times 10^{-1} \pm 6.2 \times 10^{-2}$ | $0.0 \pm 0.0$                               | $6.2 \times 10^{-4} \pm 2.0 \times 10^{-4}$ | $0.0 \pm 0.0$                            |
|                         | V3 | $1.1 \times 10^2 \pm 5.3$                   | $0.0 \pm 0.0$                               | $4.2 \pm 5.6 \times 10^{-1}$          | $1.5 \times 10^{-1} \pm 6.8 \times 10^{-2}$ | $0.0 \pm 0.0$                               | $0.0 \pm 0.0$                               | $0.0 \pm 0.0$                            |
| 20410                   | V1 | $1.1 \times 10^1 \pm 2.0 \times 10^{-1}$    | $3.1 \times 10^2 \pm 1.4 \times 10^1$       | $1.2 \times 10^2 \pm 2.9$             | $1.8 \times 10^{-1} \pm 3.0 \times 10^{-2}$ | $1.6 \times 10^{-2} \pm 5.2 \times 10^{-3}$ | $0.0 \pm 0.0$                               | $0.0 \pm 0.0$                            |
|                         | V3 | $2.7 \pm 4.1 \times 10^{-2}$                | $1.1 \times 10^2 \pm 2.4 \times 10^1$       | $1.0 \times 10^2 \pm 1.5$             | $7.5 \times 10^{-2} \pm 2.9 \times 10^{-3}$ | $2.3 \times 10^{-2} \pm 7.4 \times 10^{-3}$ | $0.0 \pm 0.0$                               | $0.0 \pm 0.0$                            |
| <b>C (Remission)</b>    |    |                                             |                                             |                                       |                                             |                                             |                                             |                                          |
|                         | V1 | $1.0 \pm 1.4 \times 10^{-3}$                | $2.4 \times 10^2 \pm 4.3 \times 10^1$       | $1.9 \times 10^1 \pm 4.3$             | $3.4 \times 10^1 \pm 6.1$                   | $1.4 \times 10^{-1} \pm 3.9 \times 10^{-2}$ | $2.4 \pm 4.1 \times 10^{-1}$                | $0.0 \pm 0.0$                            |
| 20301                   | V3 | $0.0 \pm 0.0$                               | $1.5 \times 10^2 \pm 4.4 \times 10^1$       | $3.0 \times 10^2 \pm 1.0 \times 10^2$ | $3.3 \times 10^1 \pm 2.1$                   | $0.0 \pm 0.0$                               | $1.1 \times 10^{-1} \pm 1.2 \times 10^{-2}$ | $0.0 \pm 0.0$                            |
|                         | V4 | $1.2 \pm 3.2 \times 10^{-1}$                | $1.3 \times 10^2 \pm 7.6$                   | $1.6 \times 10^2 \pm 3.4 \times 10^1$ | $9.0 \times 10^1 \pm 6.3$                   | $4.2 \times 10^{-1} \pm 1.1 \times 10^{-1}$ | $1.8 \times 10^{-2} \pm 9.5 \times 10^{-4}$ | $7.1 \pm 2.1$                            |
| 20305                   | V1 | $1.8 \times 10^1 \pm 9.2 \times 10^{-2}$    | $1.4 \times 10^2 \pm 1.8$                   | $4.3 \times 10^1 \pm 7.3$             | $1.5 \times 10^1 \pm 1.2$                   | $0.0 \pm 0.0$                               | $2.7 \times 10^1 \pm 6.9$                   | $0.0 \pm 0.0$                            |
|                         | V3 | $1.2 \times 10^2 \pm 4.1$                   | $0.0 \pm 0.0$                               | $3.9 \pm 2.2 \times 10^{-1}$          | $2.1 \times 10^{-1} \pm 6.7 \times 10^{-2}$ | $0.0 \pm 0.0$                               | $5.8 \times 10^{-3} \pm 2.0 \times 10^{-4}$ | $0.0 \pm 0.0$                            |

|                         |    |                                             |                                          |                                       |                                             |                              |                                             |               |
|-------------------------|----|---------------------------------------------|------------------------------------------|---------------------------------------|---------------------------------------------|------------------------------|---------------------------------------------|---------------|
|                         | V4 | $2.6 \pm 3.7 \times 10^{-1}$                | $7.3 \times 10^1 \pm 1.1 \times 10^1$    | $8.1 \times 10^1 \pm 1.9$             | $1.5 \times 10^1 \pm 6.7$                   | $0.0 \pm 0.0$                | $3.7 \times 10^1 \pm 1.6 \times 10^1$       | $0.0 \pm 0.0$ |
|                         | V1 | $2.0 \pm 7.4 \times 10^{-1}$                | $9.2 \pm 3.6 \times 10^{-1}$             | $3.1 \times 10^2 \pm 1.0 \times 10^1$ | $1.3 \times 10^1 \pm 1.3$                   | $0.0 \pm 0.0$                | $5.8 \times 10^{-4} \pm 5.0 \times 10^{-4}$ | $0.0 \pm 0.0$ |
| 20506                   | V3 | $6.3 \times 10^1 \pm 1.5 \times 10^1$       | $0.0 \pm 0.0$                            | $4.4 \pm 1.3$                         | $3.7 \times 10^{-2} \pm 1.0 \times 10^{-2}$ | $0.0 \pm 0.0$                | $0.0 \pm 0.0$                               | $0.0 \pm 0.0$ |
|                         | V4 | $4.3 \times 10^1 \pm 4.1$                   | $2.3 \pm 3.0 \times 10^{-2}$             | $1.8 \times 10^2 \pm 1.5$             | $1.4 \times 10^2 \pm 6.1 \times 10^1$       | $0.0 \pm 0.0$                | $3.3 \times 10^{-2} \pm 4.6 \times 10^{-4}$ | $0.0 \pm 0.0$ |
|                         | V1 | $1.5 \times 10^1 \pm 1.9$                   | $7.3 \times 10^1 \pm 2.6 \times 10^1$    | $6.0 \times 10^1 \pm 4.3$             | $1.5 \times 10^1 \pm 2.0$                   | $0.0 \pm 0.0$                | $8.1 \times 10^{-2} \pm 4.6 \times 10^{-2}$ | $0.0 \pm 0.0$ |
| 20517                   | V3 | $8.1 \times 10^1 \pm 3.3$                   | $0.0 \pm 0.0$                            | $6.1 \pm 3.0 \times 10^{-1}$          | $1.0 \times 10^{-1} \pm 1.2 \times 10^{-2}$ | $0.0 \pm 0.0$                | $3.1 \times 10^{-3} \pm 4.6 \times 10^{-4}$ | $0.0 \pm 0.0$ |
|                         | V4 | $2.0 \times 10^1 \pm 7.6$                   | $1.5 \times 10^2 \pm 5.7 \times 10^{-1}$ | $1.4 \times 10^2 \pm 1.4 \times 10^1$ | $9.7 \pm 1.8 \times 10^{-1}$                | $0.0 \pm 0.0$                | $8.2 \pm 1.3$                               | $0.0 \pm 0.0$ |
|                         | V1 | $2.4 \times 10^{-1} \pm 4.1 \times 10^{-2}$ | $1.2 \times 10^2 \pm 3.9 \times 10^1$    | $2.4 \times 10^2 \pm 3.3 \times 10^1$ | $3.9 \times 10^{-1} \pm 9.3 \times 10^{-2}$ | $0.0 \pm 0.0$                | $5.3 \times 10^{-3} \pm 4.3 \times 10^{-3}$ | $0.0 \pm 0.0$ |
| 20519                   | V3 | $3.8 \times 10^{-1} \pm 2.0 \times 10^{-2}$ | $0.0 \pm 0.0$                            | $1.1 \times 10^1 \pm 1.3$             | $7.6 \times 10^{-2} \pm 4.4 \times 10^{-2}$ | $0.0 \pm 0.0$                | $7.6 \times 10^{-3} \pm 7.2 \times 10^{-3}$ | $0.0 \pm 0.0$ |
|                         | V4 | $1.8 \pm 3.3 \times 10^{-1}$                | $0.0 \pm 0.0$                            | $5.6 \times 10^1 \pm 5.8$             | $4.3 \times 10^{-1} \pm 4.3 \times 10^{-2}$ | $0.0 \pm 0.0$                | $5.1 \times 10^{-3} \pm 3.3 \times 10^{-3}$ | $0.0 \pm 0.0$ |
| <b>C (No remission)</b> |    |                                             |                                          |                                       |                                             |                              |                                             |               |
| 20308                   | V1 | $5.9 \pm 3.3 \times 10^{-1}$                | $1.7 \times 10^2 \pm 2.4$                | $2.7 \times 10^2 \pm 5.1 \times 10^1$ | $3.0 \times 10^1 \pm 7.8$                   | $0.0 \pm 0.0$                | $1.1 \times 10^{-1} \pm 8.1 \times 10^{-3}$ | $6.5 \pm 3.3$ |
|                         | V3 | $3.3 \times 10^1 \pm 6.8$                   | $0.0 \pm 0.0$                            | $4.9 \pm 1.5 \times 10^{-1}$          | $2.7 \times 10^{-2} \pm 1.2 \times 10^{-2}$ | $0.0 \pm 0.0$                | $0.0 \pm 0.0$                               | $0.0 \pm 0.0$ |
| 20309                   | V1 | $9.8 \times 10^1 \pm 3.7$                   | $0.0 \pm 0.0$                            | $4.4 \pm 5.3 \times 10^{-1}$          | $2.9 \times 10^{-2} \pm 3.0 \times 10^{-3}$ | $0.0 \pm 0.0$                | $0.0 \pm 0.0$                               | $0.0 \pm 0.0$ |
|                         | V3 | $3.6 \times 10^1 \pm 4.2$                   | $3.1 \times 10^1 \pm 6.8$                | $7.4 \pm 7.1 \times 10^{-1}$          | $0.0 \pm 0.0$                               | $0.0 \pm 0.0$                | $6.3 \times 10^{-4} \pm 1.9 \times 10^{-4}$ | $0.0 \pm 0.0$ |
| 20401                   | V1 | $6.8 \pm 4.4 \times 10^{-1}$                | $4.8 \times 10^2 \pm 8.5 \times 10^1$    | $1.9 \times 10^2 \pm 1.7 \times 10^1$ | $2.4 \times 10^1 \pm 4.9$                   | $1.6 \pm 6.7 \times 10^{-1}$ | $6.9 \times 10^{-2} \pm 2.1 \times 10^{-2}$ | $8.3 \pm 5.3$ |

|                      |    |                                             |                                          |                                       |                                             |                                             |                                             |                                       |
|----------------------|----|---------------------------------------------|------------------------------------------|---------------------------------------|---------------------------------------------|---------------------------------------------|---------------------------------------------|---------------------------------------|
|                      | V3 | $2.1 \times 10^1 \pm 9.7 \times 10^{-1}$    | $2.0 \times 10^3 \pm 4.8 \times 10^2$    | $1.2 \times 10^2 \pm 3.0 \times 10^1$ | $5.3 \times 10^1 \pm 4.0 \times 10^1$       | $2.1 \times 10^{-1} \pm 8.8 \times 10^{-2}$ | $4.0 \times 10^{-2} \pm 3.4 \times 10^{-3}$ | 0.0±0.0                               |
| 20405                | V1 | 0.0±0.0                                     | $7.9 \times 10^1 \pm 7.5 \times 10^{-1}$ | $3.3 \times 10^2 \pm 7.1$             | $1.2 \times 10^1 \pm 5.0$                   | 0.0±0.0                                     | $2.1 \pm 4.4 \times 10^{-1}$                | 5.6±1.1                               |
|                      | V3 | 0.0±0.0                                     | $1.3 \pm 4.3 \times 10^{-1}$             | $3.4 \times 10^2 \pm 1.3 \times 10^1$ | $1.1 \times 10^2 \pm 2.4 \times 10^1$       | 0.0±0.0                                     | 4.5±2.5                                     | 0.0±0.0                               |
| 20409                | V1 | $2.4 \times 10^1 \pm 8.7$                   | $3.6 \times 10^1 \pm 9.4$                | $5.8 \times 10^2 \pm 5.7$             | $2.3 \times 10^1 \pm 1.3$                   | 0.0±0.0                                     | 0.0±0.0                                     | 0.0±0.0                               |
|                      | V3 | $1.9 \times 10^{-1} \pm 2.1 \times 10^{-2}$ | $2.6 \pm 9.2 \times 10^{-1}$             | $9.9 \times 10^1 \pm 3.2$             | $1.1 \times 10^1 \pm 1.0$                   | 0.0±0.0                                     | 0.0±0.0                                     | 0.0±0.0                               |
| 20502                | V1 | $6.8 \pm 2.0 \times 10^{-1}$                | $4.6 \times 10^1 \pm 6.4$                | $9.0 \times 10^2 \pm 7.3 \times 10^1$ | $7.5 \times 10^1 \pm 1.5 \times 10^1$       | $5.9 \times 10^{-2} \pm 1.6 \times 10^{-2}$ | $3.0 \times 10^1 \pm 1.8 \times 10^1$       | 0.0±0.0                               |
|                      | V3 | $9.9 \times 10^{-1} \pm 1.5 \times 10^{-2}$ | $5.3 \times 10^1 \pm 4.2$                | $2.7 \times 10^2 \pm 6.9$             | $4.3 \pm 3.1 \times 10^{-2}$                | $4.6 \times 10^{-2} \pm 8.3 \times 10^{-3}$ | 4.2±1.1                                     | $1.6 \times 10^2 \pm 1.2 \times 10^1$ |
| 20518                | V1 | $8.7 \times 10^{-1} \pm 5.0 \times 10^{-3}$ | 0.0±0.0                                  | $7.4 \times 10^1 \pm 9.9$             | $4.2 \times 10^1 \pm 3.4$                   | 0.0±0.0                                     | $1.0 \times 10^1 \pm 2.6$                   | $3.1 \times 10^1 \pm 1.6 \times 10^1$ |
|                      | V3 | $1.1 \pm 3.4 \times 10^{-1}$                | $6.7 \pm 5.2 \times 10^{-2}$             | $1.6 \times 10^2 \pm 5.0 \times 10^1$ | $4.4 \times 10^1 \pm 4.4$                   | $6.7 \times 10^{-2} \pm 2.6 \times 10^{-2}$ | 5.1±1.8                                     | 0.0±0.0                               |
| 20523                | V1 | $8.7 \pm 9.9 \times 10^{-1}$                | $4.5 \times 10^1 \pm 2.9$                | $1.2 \times 10^2 \pm 2.9$             | $2.4 \pm 4.7 \times 10^{-1}$                | 0.0±0.0                                     | $8.7 \times 10^{-2} \pm 6.4 \times 10^{-2}$ | 0.0±0.0                               |
|                      | V3 | $5.9 \pm 1.6 \times 10^{-1}$                | $5.2 \times 10^1 \pm 5.9$                | $6.5 \times 10^1 \pm 7.8$             | $2.2 \times 10^{-1} \pm 1.7 \times 10^{-2}$ | 0.0±0.0                                     | 1.6±1.2                                     | 0.0±0.0                               |
| <b>D (Remission)</b> |    |                                             |                                          |                                       |                                             |                                             |                                             |                                       |
|                      | V1 | $9.0 \pm 3.0 \times 10^{-1}$                | $1.6 \times 10^1 \pm 2.4$                | $7.0 \times 10^1 \pm 6.5$             | $5.0 \times 10^{-1} \pm 5.8 \times 10^{-2}$ | $3.2 \times 10^{-2} \pm 8.4 \times 10^{-3}$ | 0.0±0.0                                     | 0.0±0.0                               |
| 20310                | V3 | $1.3 \pm 2.0 \times 10^{-1}$                | $1.1 \times 10^1 \pm 2.3$                | $7.4 \times 10^1 \pm 2.9$             | $2.8 \times 10^{-1} \pm 7.0 \times 10^{-2}$ | 0.0±0.0                                     | 0.0±0.0                                     | 0.0±0.0                               |
|                      | V4 | $5.5 \times 10^{-1} \pm 1.0 \times 10^{-2}$ | 9.5±1.6                                  | $7.5 \times 10^1 \pm 2.1$             | $4.7 \times 10^{-1} \pm 1.2 \times 10^{-1}$ | 0.0±0.0                                     | 0.0±0.0                                     | 0.0±0.0                               |
| 20311                | V1 | $1.1 \times 10^2 \pm 7.5$                   | 0.0±0.0                                  | $4.4 \pm 8.9 \times 10^{-1}$          | 0.0±0.0                                     | 0.0±0.0                                     | $1.4 \times 10^{-2} \pm 1.3 \times 10^{-2}$ | 0.0±0.0                               |

|                         |    |                                             |                                       |                                          |                                             |                                             |                                             |                                       |
|-------------------------|----|---------------------------------------------|---------------------------------------|------------------------------------------|---------------------------------------------|---------------------------------------------|---------------------------------------------|---------------------------------------|
|                         | V3 | $2.7 \times 10^1 \pm 2.3$                   | $0.0 \pm 0.0$                         | $9.5 \pm 2.8 \times 10^{-2}$             | $6.3 \times 10^{-2} \pm 3.1 \times 10^{-3}$ | $0.0 \pm 0.0$                               | $0.0 \pm 0.0$                               | $0.0 \pm 0.0$                         |
|                         | V4 | $5.2 \times 10^1 \pm 3.6$                   | $0.0 \pm 0.0$                         | $1.0 \times 10^1 \pm 1.3$                | $0.0 \pm 0.0$                               | $0.0 \pm 0.0$                               | $0.0 \pm 0.0$                               | $0.0 \pm 0.0$                         |
|                         | V1 | $3.5 \pm 2.7 \times 10^{-1}$                | $1.1 \times 10^1 \pm 3.7$             | $1.0 \times 10^1 \pm 7.3 \times 10^{-1}$ | $3.3 \times 10^{-2} \pm 1.4 \times 10^{-2}$ | $0.0 \pm 0.0$                               | $0.0 \pm 0.0$                               | $0.0 \pm 0.0$                         |
| 20312                   | V3 | $2.3 \pm 5.5 \times 10^{-1}$                | $1.9 \times 10^1 \pm 2.7$             | $1.0 \times 10^1 \pm 4.6 \times 10^{-1}$ | $0.0 \pm 0.0$                               | $0.0 \pm 0.0$                               | $0.0 \pm 0.0$                               | $0.0 \pm 0.0$                         |
|                         | V4 | $4.0 \pm 3.4 \times 10^{-1}$                | $3.7 \times 10^1 \pm 5.6$             | $8.1 \pm 5.4 \times 10^{-1}$             | $3.7 \times 10^{-2} \pm 1.9 \times 10^{-2}$ | $0.0 \pm 0.0$                               | $0.0 \pm 0.0$                               | $0.0 \pm 0.0$                         |
| <b>D (No remission)</b> |    |                                             |                                       |                                          |                                             |                                             |                                             |                                       |
| 20304                   | V1 | $2.6 \pm 8.0 \times 10^{-1}$                | $4.6 \times 10^2 \pm 5.9 \times 10^1$ | $3.0 \pm 1.5 \times 10^{-1}$             | $1.6 \times 10^1 \pm 5.4$                   | $1.6 \times 10^{-1} \pm 7.8 \times 10^{-3}$ | $0.0 \pm 0.0$                               | $0.0 \pm 0.0$                         |
|                         | V3 | $7.8 \pm 2.7 \times 10^{-1}$                | $1.9 \times 10^2 \pm 4.8$             | $2.3 \pm 4.2 \times 10^{-1}$             | $2.5 \pm 4.1 \times 10^{-1}$                | $2.8 \times 10^{-1} \pm 7.3 \times 10^{-2}$ | $4.0 \times 10^{-3} \pm 3.6 \times 10^{-3}$ | $0.0 \pm 0.0$                         |
| 20404                   | V1 | $8.7 \times 10^{-1} \pm 3.5 \times 10^{-2}$ | $5.8 \pm 2.5$                         | $3.9 \times 10^2 \pm 1.0 \times 10^1$    | $7.8 \times 10^1 \pm 2.6$                   | $3.1 \times 10^{-2} \pm 1.6 \times 10^{-3}$ | $1.1 \pm 1.0$                               | $4.4 \times 10^2 \pm 2.0 \times 10^1$ |
|                         | V3 | $0.0 \pm 0.0$                               | $0.0 \pm 0.0$                         | $1.0 \times 10^2 \pm 6.8 \times 10^{-1}$ | $3.7 \times 10^1 \pm 2.1$                   | $0.0 \pm 0.0$                               | $7.2 \pm 4.0 \times 10^{-2}$                | $1.4 \times 10^2 \pm 5.8$             |
| 20407                   | V1 | $4.0 \times 10^1 \pm 1.2$                   | $5.5 \pm 3.1 \times 10^{-2}$          | $1.3 \times 10^1 \pm 6.2 \times 10^{-1}$ | $6.0 \times 10^{-1} \pm 2.8 \times 10^{-3}$ | $0.0 \pm 0.0$                               | $9.8 \times 10^{-1} \pm 5.8 \times 10^{-1}$ | $0.0 \pm 0.0$                         |
|                         | V3 | $9.8 \pm 3.0 \times 10^{-1}$                | $3.6 \times 10^1 \pm 8.8$             | $7.8 \times 10^1 \pm 1.1$                | $5.8 \pm 5.5 \times 10^{-1}$                | $0.0 \pm 0.0$                               | $3.7 \pm 1.8$                               | $0.0 \pm 0.0$                         |
| 20411                   | V1 | $3.9 \times 10^1 \pm 9.0 \times 10^{-1}$    | $3.9 \pm 4.3 \times 10^{-1}$          | $2.3 \times 10^2 \pm 3.2 \times 10^1$    | $1.5 \times 10^1 \pm 3.9 \times 10^{-1}$    | $0.0 \pm 0.0$                               | $4.5 \times 10^{-3} \pm 1.8 \times 10^{-3}$ | $0.0 \pm 0.0$                         |
|                         | V3 | $1.0 \times 10^1 \pm 1.3 \times 10^{-1}$    | $3.2 \pm 6.4 \times 10^{-1}$          | $1.8 \times 10^2 \pm 3.4 \times 10^1$    | $6.5 \pm 3.5 \times 10^{-2}$                | $0.0 \pm 0.0$                               | $0.0 \pm 0.0$                               | $0.0 \pm 0.0$                         |
| 20504                   | V1 | $2.1 \times 10^1 \pm 3.1$                   | $1.5 \times 10^1 \pm 6.0$             | $8.9 \times 10^1 \pm 7.4$                | $2.9 \times 10^1 \pm 6.3$                   | $1.6 \times 10^{-2} \pm 2.8 \times 10^{-3}$ | $7.1 \times 10^{-3} \pm 5.5 \times 10^{-3}$ | $5.1 \pm 1.2$                         |

|       |    |                                             |                                       |                                       |                                             |               |                                             |                                       |
|-------|----|---------------------------------------------|---------------------------------------|---------------------------------------|---------------------------------------------|---------------|---------------------------------------------|---------------------------------------|
|       | V3 | $8.2 \times 10^1 \pm 6.4$                   | $0.0 \pm 0.0$                         | $4.4 \pm 6.2 \times 10^{-1}$          | $4.0 \times 10^{-2} \pm 5.8 \times 10^{-3}$ | $0.0 \pm 0.0$ | $0.0 \pm 0.0$                               | $0.0 \pm 0.0$                         |
| 20512 | V1 | $3.1 \times 10^1 \pm 3.8$                   | $3.5 \times 10^2 \pm 4.3 \times 10^1$ | $8.6 \times 10^2 \pm 5.6 \times 10^1$ | $1.7 \times 10^1 \pm 6.2$                   | $0.0 \pm 0.0$ | $3.6 \times 10^1 \pm 1.2 \times 10^1$       | $3.6 \times 10^1 \pm 2.5 \times 10^1$ |
|       | V3 | $2.4 \pm 3.5 \times 10^{-1}$                | $1.8 \pm 9.0 \times 10^{-1}$          | $2.6 \times 10^1 \pm 2.8$             | $1.1 \pm 1.4 \times 10^{-1}$                | $0.0 \pm 0.0$ | $4.7 \pm 1.6$                               | $0.0 \pm 0.0$                         |
| 20527 | V1 | $3.3 \times 10^{-1} \pm 3.2 \times 10^{-2}$ | $1.2 \times 10^2 \pm 6.3$             | $1.2 \times 10^2 \pm 2.0 \times 10^1$ | $2.1 \times 10^1 \pm 3.3$                   | $0.0 \pm 0.0$ | $1.0 \times 10^{-1} \pm 7.7 \times 10^{-2}$ | $0.0 \pm 0.0$                         |
|       | V3 | $2.4 \pm 8.7 \times 10^{-1}$                | $1.7 \times 10^2 \pm 1.7 \times 10^1$ | $1.1 \times 10^2 \pm 5.9 \times 10^1$ | $3.2 \times 10^1 \pm 5.6$                   | $0.0 \pm 0.0$ | $1.1 \pm 7.9 \times 10^{-1}$                | $0.0 \pm 0.0$                         |
